# Supplementary material for: Direct fluorescence quantification of sulfadiazine from quenching of novel functional monomer based molecularly imprinted polymers
Source: Royal Society of Chemistry journal article supplement (doi:10.1039/c5ay01023c), 2015-01-01
Supplement: c5ay01023c1.pdf [file c5ay01023c1.pdf]

## Electronic Supplementary Information

# Direct fluorescent quantification of sulfadiazine from quenching of novel functional monomer based molecularly imprinted polymer

Zhe Zhang<sup>1a</sup>, Ming Li<sup>1a</sup>, Feng Shen<sup>b</sup>, Xueqin Ren<sup>a\*</sup>

College of Resources and Environmental Sciences, China Agricultural University, Beijing, P. R. China

E-mail: renxueqin@cau.edu.cn

Tel: 86-10-62733407

Fax: 86-10-62731016

## 1. Synthesis of AOMC

<sup>13</sup>C and MS spectra were shown in Fig. S1.

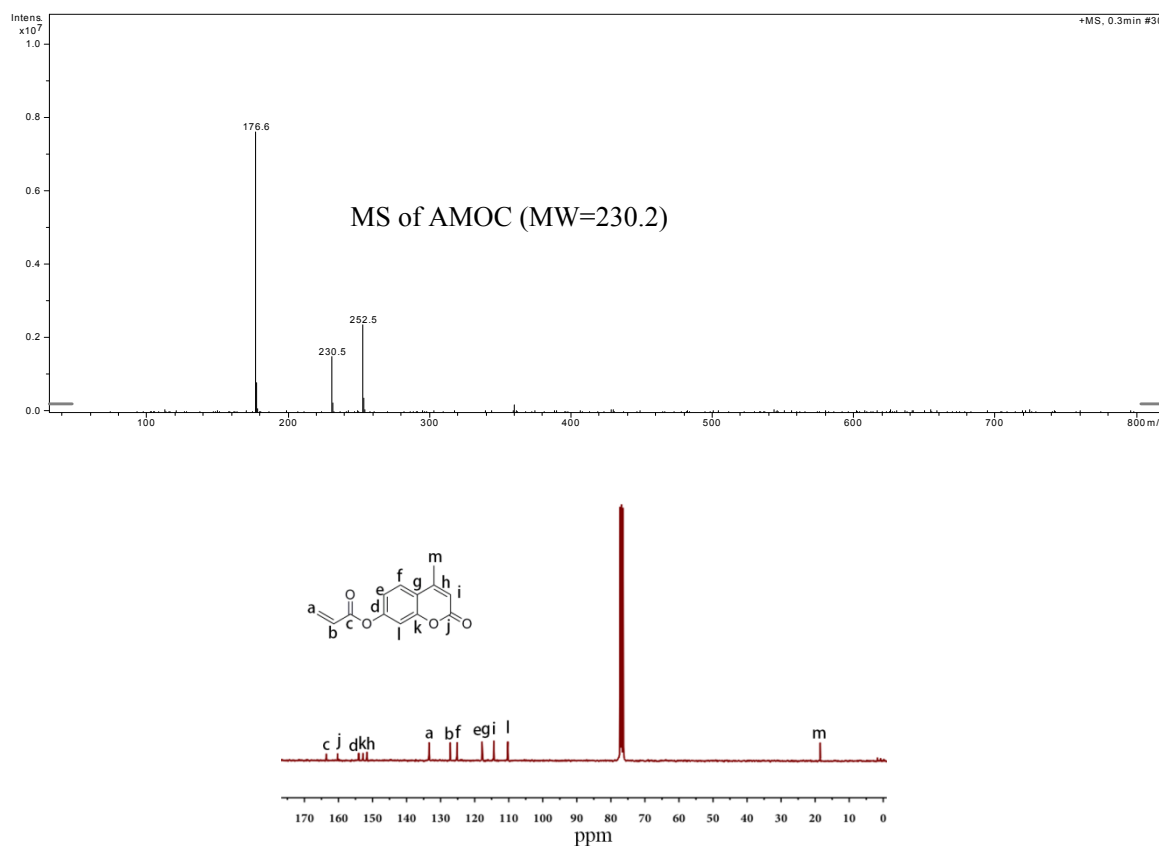

Fig.S1 MS and <sup>13</sup>C spectra of AOMC

$^{13}\text{C}$  NMR spectra (75 MHz) was recorded at room temperature in  $\text{CDCl}_3$  on BRUKER DPX (Karlsruhe, Germany).  $^{13}\text{C}$  NMR(75MHz,  $\text{CDCl}_3$ )  $\delta$  163.60 (s), 160.26(s), 154.04(s), 152.82(s), 151.67(s), 133.39(s), 127.16(s), 125.19(s), 117.77(d), 114.39(s), 110.26(s), 117.25(s), 77.25(s), 76.83(s), 76.40(s), 18.51(s).

MS spectra were recorded using a JEOL JMS-700 mass spectrometer.

## 2. Characteration of MIPs

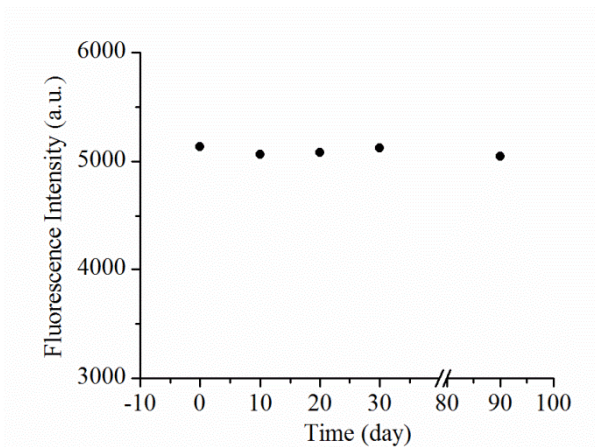

Fig. S2 Fluorescence shelf-life of AMOC.

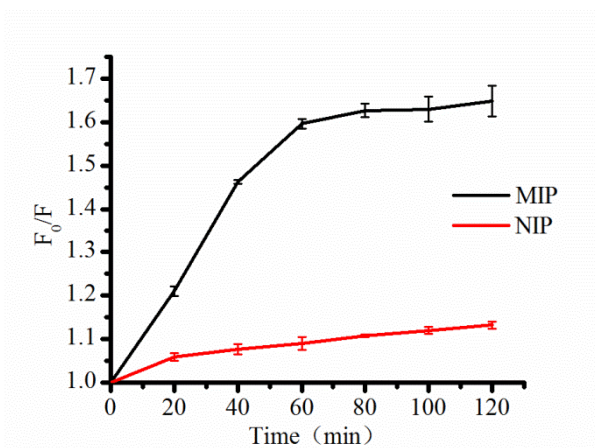

Fig. S3 Dynamic adsorption curves of the MIPs and NIPs for SDz.
